# Supplementary material
Source: ML conference proceedings conference paper supplement (https://openreview.net/forum?id=qf6Nmm-_6Z)
Supplement: supplementary_material [file attachment]

# SUPPLEMENTARY MATERIAL

**Anonymous authors**

Paper under double-blind review

## 1 DERIVATION OF ELBO BOUND

$$\log(p_\theta(\mathbf{A})) = \log\left(\int \sum_{\mathbf{c}} p_\theta(\mathbf{Z}, \mathbf{c}, \mathbf{A}) d\mathbf{Z}\right) \quad (1)$$

$$= \log\left(\int \sum_{\mathbf{c}} p(\mathbf{Z}) p_\theta(\mathbf{c}|\mathbf{Z}) p_\theta(\mathbf{A}|\mathbf{c}, \mathbf{Z}) d\mathbf{Z}\right) \quad (2)$$

$$= \log\left(\mathbb{E}_{(\mathbf{Z}, \mathbf{c}) \sim q_\phi(\mathbf{Z}, \mathbf{c}|\mathcal{I})} \left\{ \frac{p(\mathbf{Z}) p_\theta(\mathbf{c}|\mathbf{Z}) p_\theta(\mathbf{A}|\mathbf{c}, \mathbf{Z})}{q_\phi(\mathbf{Z}|\mathcal{I}) q_\phi(\mathbf{c}|\mathbf{Z}, \mathcal{I})} \right\}\right) \quad (3)$$

$$\geq \mathbb{E}_{(\mathbf{Z}, \mathbf{c}) \sim q_\phi(\mathbf{Z}, \mathbf{c}|\mathcal{I})} \left\{ \log\left(\frac{p(\mathbf{Z}) p_\theta(\mathbf{c}|\mathbf{Z}) p_\theta(\mathbf{A}|\mathbf{c}, \mathbf{Z})}{q_\phi(\mathbf{Z}|\mathcal{I}) q_\phi(\mathbf{c}|\mathbf{Z}, \mathcal{I})}\right) \right\} \quad (4)$$

$$= \mathbb{E}_{(\mathbf{Z}, \mathbf{c}) \sim q_\phi(\mathbf{Z}, \mathbf{c}|\mathcal{I})} \left\{ \log\left(\frac{p(\mathbf{Z})}{q_\phi(\mathbf{Z}|\mathcal{I})}\right) + \log\left(\frac{p_\theta(\mathbf{c}|\mathbf{Z})}{q_\phi(\mathbf{c}|\mathbf{Z}, \mathcal{I})}\right) + \log\left(p_\theta(\mathbf{A}|\mathbf{c}, \mathbf{Z})\right) \right\} \quad (5)$$

$$\begin{aligned} &= \mathbb{E}_{\mathbf{Z} \sim q_\phi(\mathbf{Z}|\mathcal{I})} \left\{ \log\left(\frac{p(\mathbf{Z})}{q_\phi(\mathbf{Z}|\mathcal{I})}\right) \right\} \\ &+ \mathbb{E}_{(\mathbf{Z}, \mathbf{c}) \sim q_\phi(\mathbf{Z}, \mathbf{c}|\mathcal{I})} \left\{ \log\left(\frac{p_\theta(\mathbf{c}|\mathbf{Z})}{q_\phi(\mathbf{c}|\mathbf{Z}, \mathcal{I})}\right) \right\} \\ &+ \mathbb{E}_{(\mathbf{Z}, \mathbf{c}) \sim q_\phi(\mathbf{Z}, \mathbf{c}|\mathcal{I})} \left\{ \log\left(p_\theta(\mathbf{A}|\mathbf{c}, \mathbf{Z})\right) \right\}. \end{aligned} \quad (6)$$

Where (4) follows from Jensen's Inequality. First term of (6) is given by:

$$\mathbb{E}_{\mathbf{Z} \sim q_\phi(\mathbf{Z}|\mathcal{I})} \left\{ \log\left(\frac{p(\mathbf{Z})}{q_\phi(\mathbf{Z}|\mathcal{I})}\right) \right\} = \sum_{i=1}^N \mathbb{E}_{\mathbf{z}_i \sim q_\phi(\mathbf{z}_i|\mathcal{I})} \left\{ \log\left(\frac{p(\mathbf{z}_i)}{q_\phi(\mathbf{z}_i|\mathcal{I})}\right) \right\} \quad (7)$$

$$= - \sum_{i=1}^N D_{KL}(q_\phi(\mathbf{z}_i|\mathcal{I}) \parallel p(\mathbf{z}_i)). \quad (8)$$

Second term of Eq. (6) can be derived as:

$$\begin{aligned} &\mathbb{E}_{(\mathbf{Z}, \mathbf{c}) \sim q_\phi(\mathbf{Z}, \mathbf{c}|\mathcal{I})} \left\{ \log\left(\frac{p_\theta(\mathbf{c}|\mathbf{Z})}{q_\phi(\mathbf{c}|\mathbf{Z}, \mathcal{I})}\right) \right\} \\ &= \sum_{i=1}^N \mathbb{E}_{(\mathbf{z}_i, c_i) \sim q_\phi(\mathbf{z}_i, c_i|\mathcal{I})} \left\{ \log\left(\frac{p_\theta(c_i|\mathbf{z}_i)}{q_\phi(c_i|\mathbf{z}_i, \mathcal{I})}\right) \right\} \end{aligned} \quad (9)$$

$$\approx \sum_{i=1}^N \frac{1}{M} \sum_{m=1}^M \mathbb{E}_{c_i \sim q_\phi(c_i|\mathbf{z}_i^{(m)}, \mathcal{I})} \left\{ \log\left(\frac{p_\theta(c_i|\mathbf{z}_i^{(m)})}{q_\phi(c_i|\mathbf{z}_i^{(m)}, \mathcal{I})}\right) \right\} \quad (10)$$

$$= - \sum_{i=1}^N \frac{1}{M} \sum_{m=1}^M D_{KL}(q_\phi(c_i|\mathbf{z}_i^{(m)}, \mathcal{I}) \parallel p_\theta(c_i|\mathbf{z}_i^{(m)})) \quad (11)$$

where (10) follows from Eq. (9) by replacing the expectation over  $\mathbf{z}_i$  with sample mean by generating  $M$  samples  $\mathbf{z}_i^{(m)}$  from distribution  $q(\mathbf{z}_i|\mathcal{I})$ . Assuming  $a_{ij} \in [0, 1] \forall i$ , the third term of Eq. (6) is the negative of binary cross entropy (BCE) between observed and predicted edges.

$$\begin{aligned}
& \mathbb{E}_{(\mathbf{Z}, \mathbf{c}) \sim q_\phi(\mathbf{Z}, \mathbf{c} | \mathcal{I})} \left\{ \log \left( p_\theta(\mathbf{A} | \mathbf{c}, \mathbf{Z}) \right) \right\} \\
&= \sum_{(i,j) \in \mathcal{E}} \mathbb{E}_{(\mathbf{z}_i, \mathbf{z}_j, c_i, c_j) \sim q_\phi(\mathbf{z}_i, \mathbf{z}_j, c_i, c_j | \mathcal{I})} \left\{ \log \left( p_\theta(a_{ij} | c_i, c_j, \mathbf{z}_i, \mathbf{z}_j) \right) \right\}
\end{aligned} \tag{12}$$

Hence, by substituting Eq. (8) and Eq. (11) in Eq. (6), we get the ELBO bound as:

$$\begin{aligned}
\mathcal{L}_{ELBO} &\approx - \sum_{i=1}^N D_{KL}(q_\phi(\mathbf{z}_i | \mathcal{I}) \parallel p(\mathbf{z}_i)) \\
&\quad - \sum_{i=1}^N \frac{1}{M} \sum_{m=1}^M D_{KL}(q_\phi(c_i | \mathbf{z}_i^{(m)}, \mathcal{I}) \parallel p(c_i | \mathbf{z}_i^{(m)})) \\
&\quad + \sum_{(i,j) \in \mathcal{E}} \mathbb{E}_{(\mathbf{z}_i, \mathbf{z}_j, c_i, c_j) \sim q_\phi(\mathbf{z}_i, \mathbf{z}_j, c_i, c_j | \mathcal{I})} \left\{ \log \left( p_\theta(a_{ij} | c_i, c_j, \mathbf{z}_i, \mathbf{z}_j) \right) \right\}
\end{aligned} \tag{13}$$

## 2 VISUALIZATION

Our experiments demonstrate that a single community-aware node embedding is sufficient to aid in both the node representation and community assignment tasks. This is also qualitatively demonstrated by graph visualizations of node embeddings (obtained via t-SNE (?)) and inferred communities for two datasets, fb107 and fb3437, presented in Fig. 1.

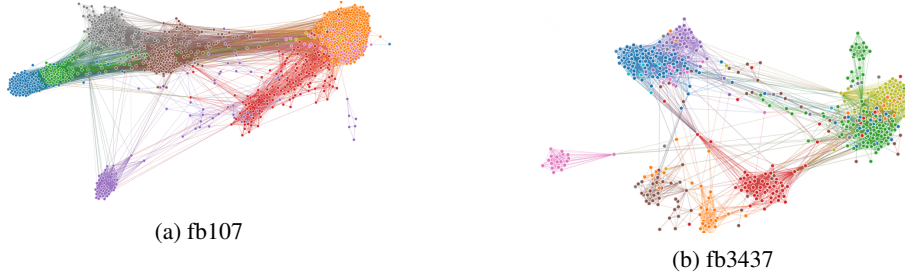

Figure 1: Graph visualization with community assignments (better viewed in color)
